# Supplementary material for: Novel 3D hierarchically structured cauliflower-shaped SnO2 nanospheres as effective photoelectrodes in hybrid photovoltaics
Source: Royal Society of Chemistry journal article supplement (doi:10.1039/c9na00192a), 2019-01-01
Supplement: c9na00192a1.pdf [file c9na00192a1.pdf]

# **Supplementary Information**

**for**

**Novel 3D hierarchically-structured cauliflower-shaped SnO<sub>2</sub>  
nanospheres as effective photoelectrodes in hybrid photovoltaics**

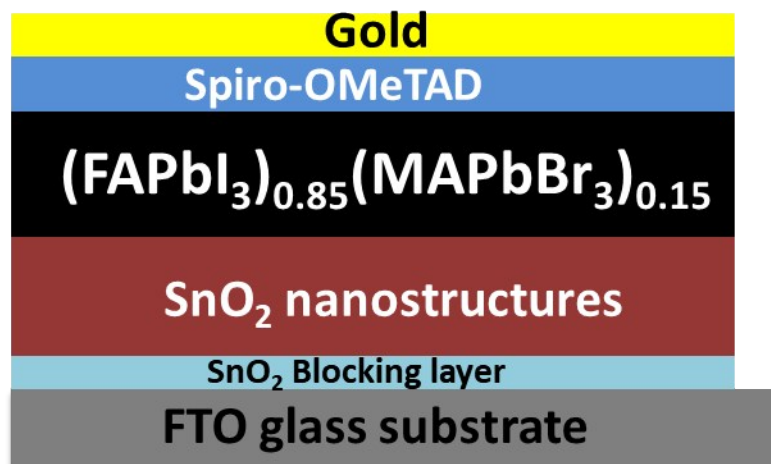

**Scheme S1.** Schematic illustration of complete device.

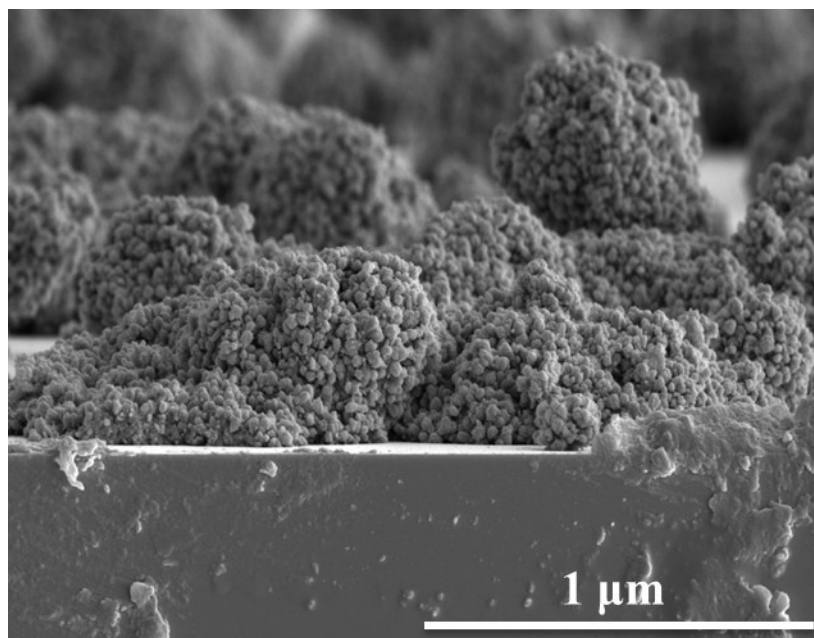

**Fig. S1** Cross-sectional SEM image of 3D hierarchical SnO<sub>2</sub> nanostructures.

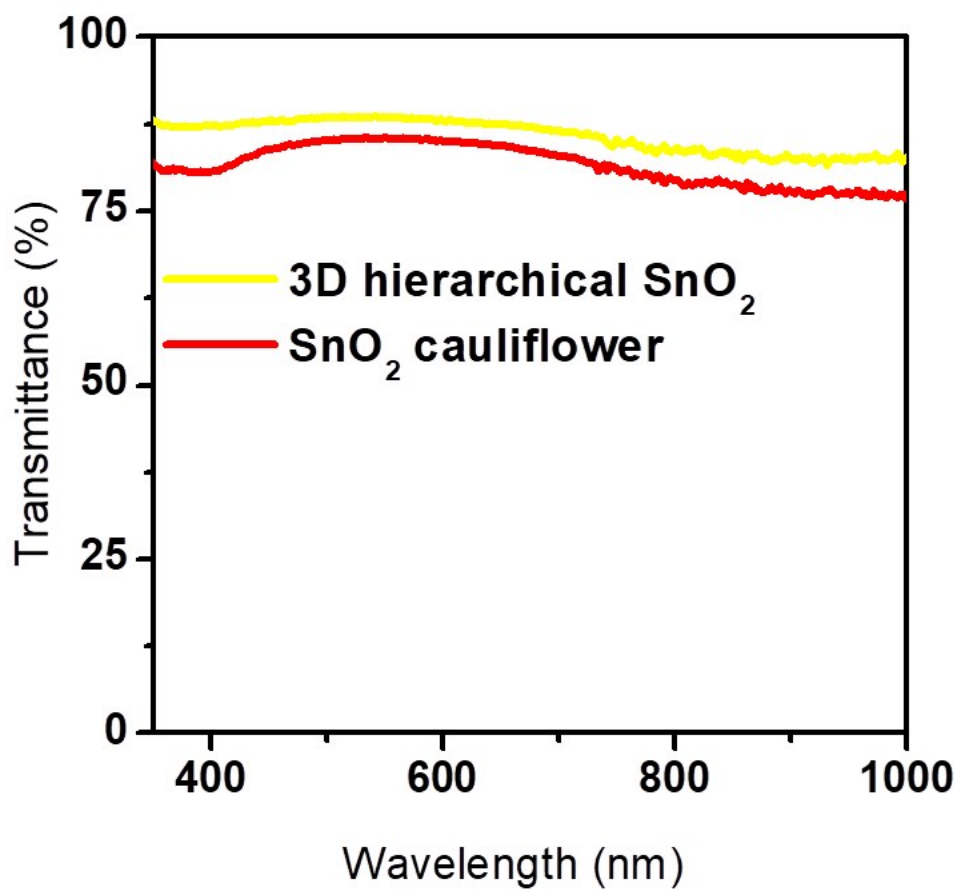

**Fig. S2** Optical transmittance spectra of two different SnO<sub>2</sub> nanostructures.

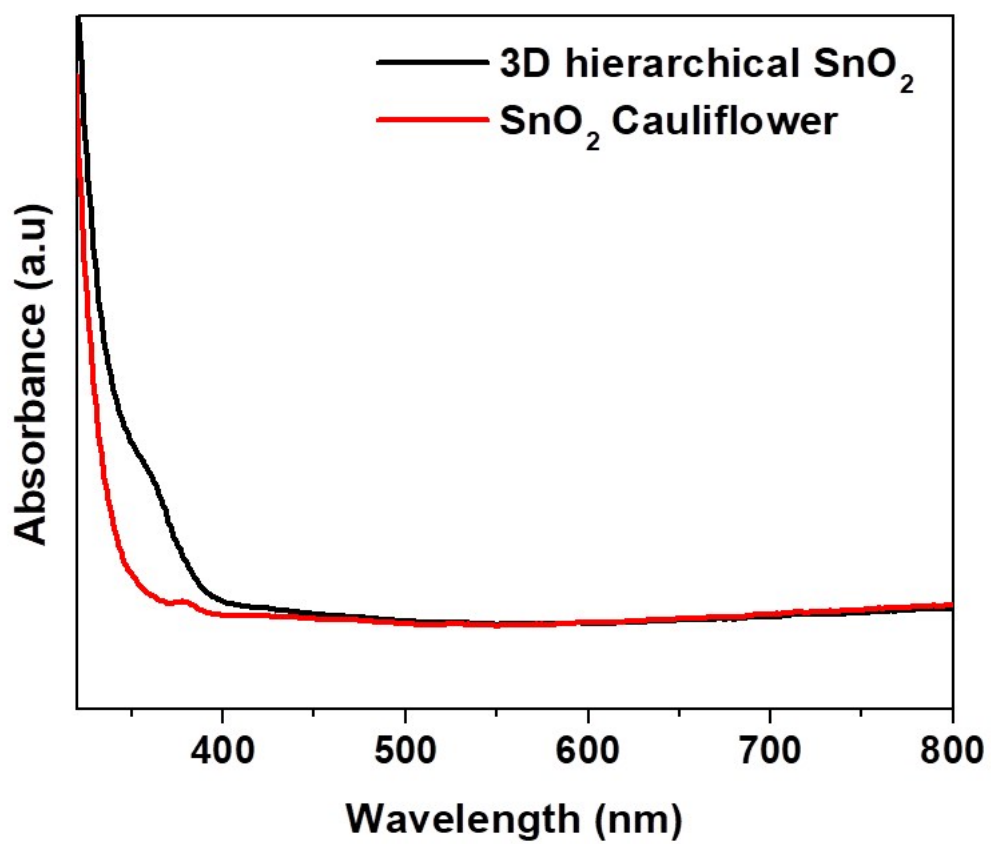

**Fig. S3** Absorbance spectra of two different SnO<sub>2</sub> nanostructures.

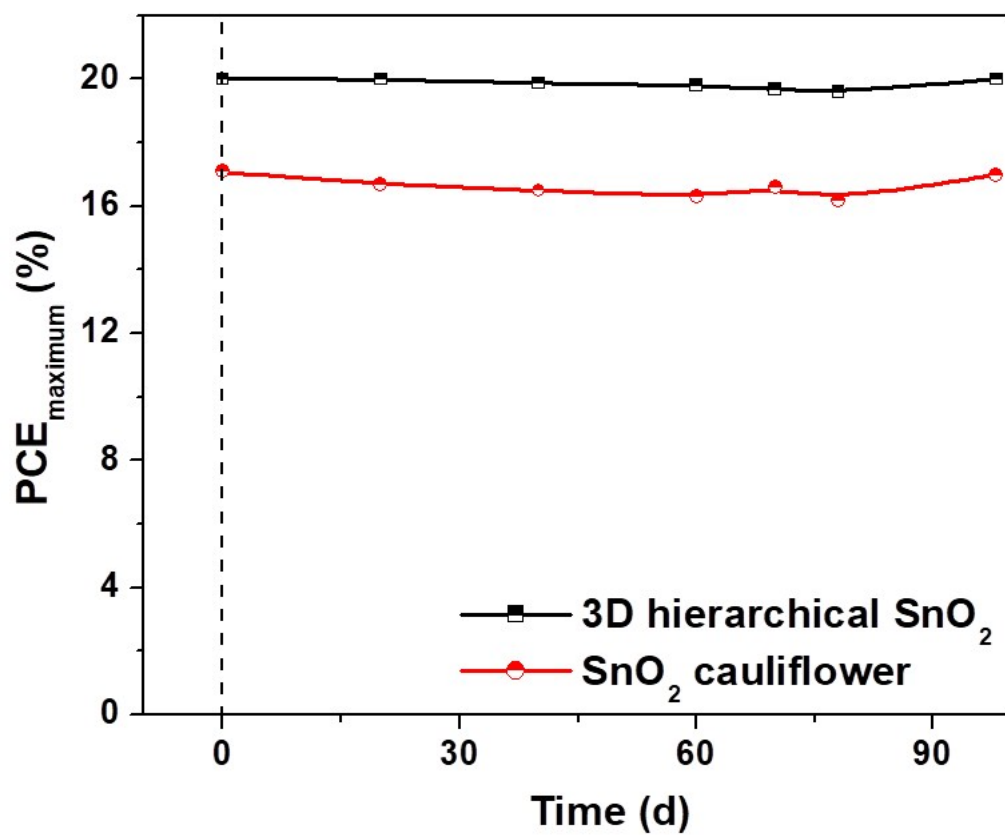

Fig. S4 Long-term stability testing of two different SnO<sub>2</sub> nanostructures.
